# Supplementary material for: Mineralization of ammunition wastewater by a micron-size Fe0/O3 process (mFe0/O3)
Source: Royal Society of Chemistry journal article supplement (doi:10.1039/c6ra06135d), 2016-01-01
Supplement: c6ra06135d1.pdf [file c6ra06135d1.pdf]

**Supporting Information for**

**Mineralization of ammunition wastewater by the micron-size Fe<sup>0</sup>/O<sub>3</sub>  
process (mFe<sup>0</sup>/O<sub>3</sub>)**

Zhaokun Xiong<sup>1</sup>, Yue Yuan<sup>1</sup>, Bo Lai<sup>1\*</sup>, Ping Yang<sup>1</sup>, Yuexi Zhou<sup>2</sup>

*1. Department of Environmental Science and Engineering, School of Architecture and Environment, Sichuan University, Chengdu 610065, China*

*2. Research Center of Water Pollution Control Technology, Chinese Research Academy of Environmental Sciences, Beijing 100012, China*

\* Corresponding author. Tel/fax: +86 18682752302; E-mail: laibo@scu.edu.cn

Submitted to

**RSC Advances**

**Summary:**

Page 2: Fig. S1

Page 3-5: Fig. S2

Page 6: Fig. S3

---

\* Corresponding authors. Tel./fax: +86 18682752302  
E-mail address: [laibo1981@163.com](mailto:laibo1981@163.com) (Bo Lai)

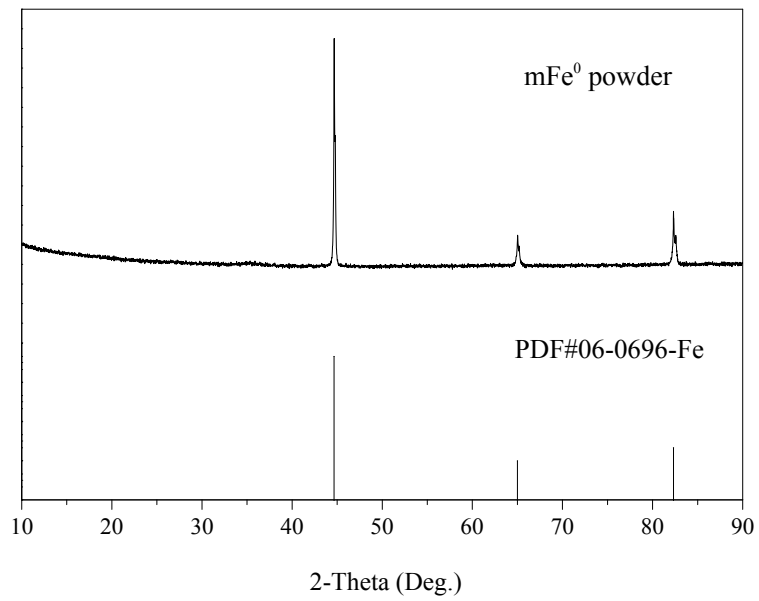

**Fig. S1. XRD patterns of the mFe<sup>0</sup> powder.**

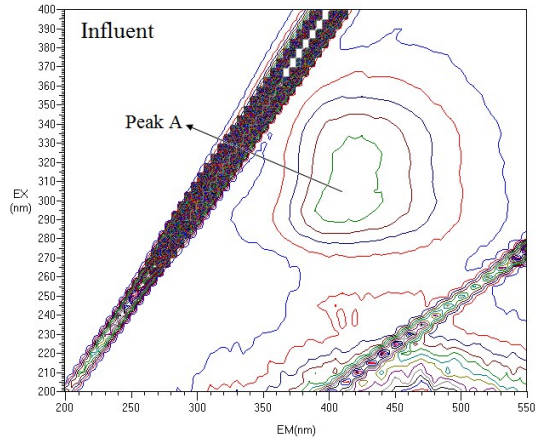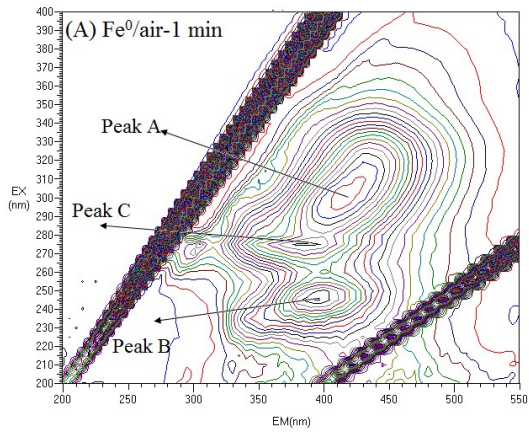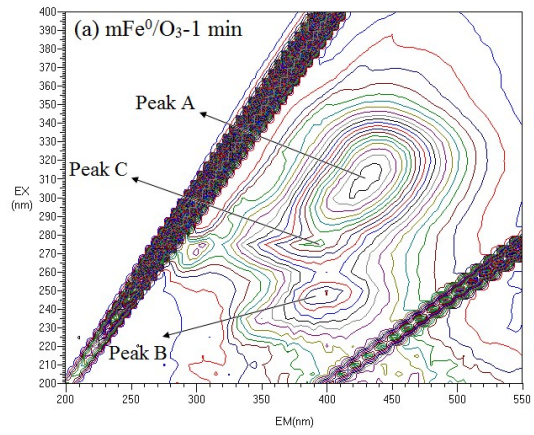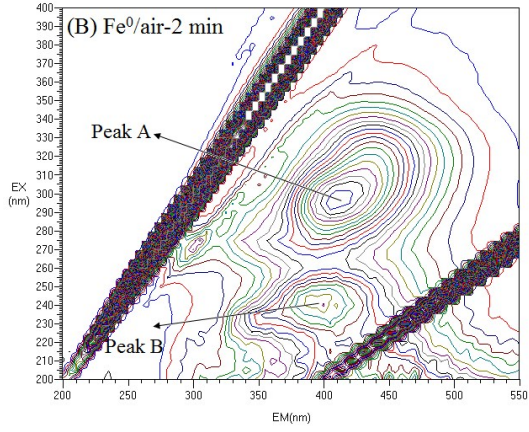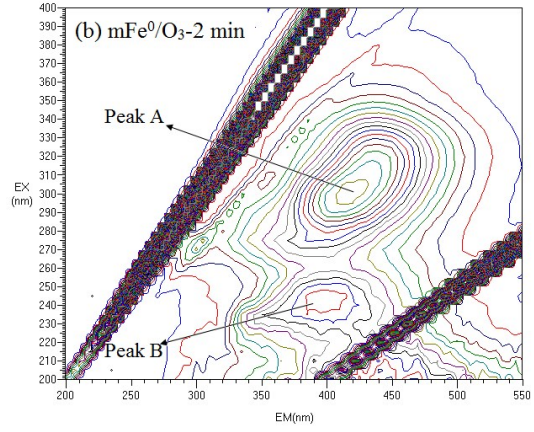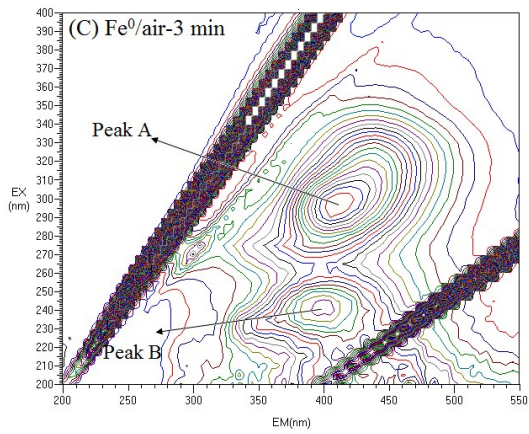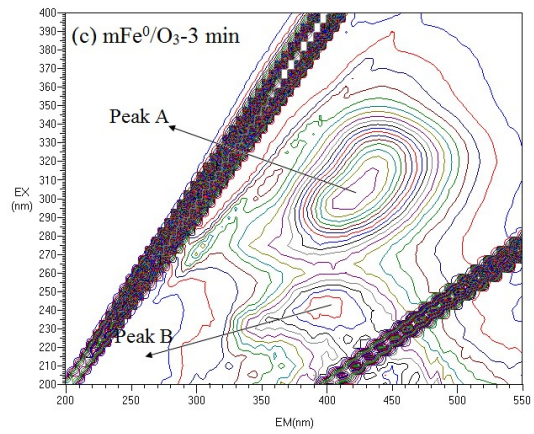

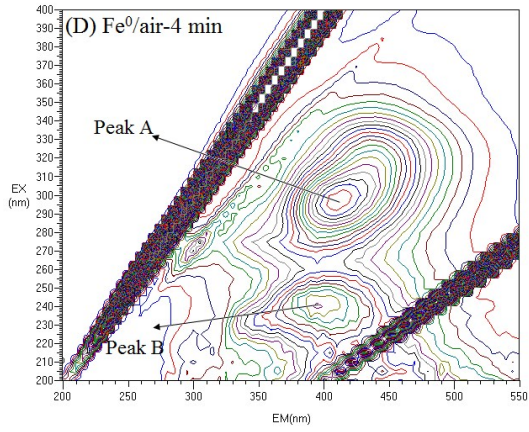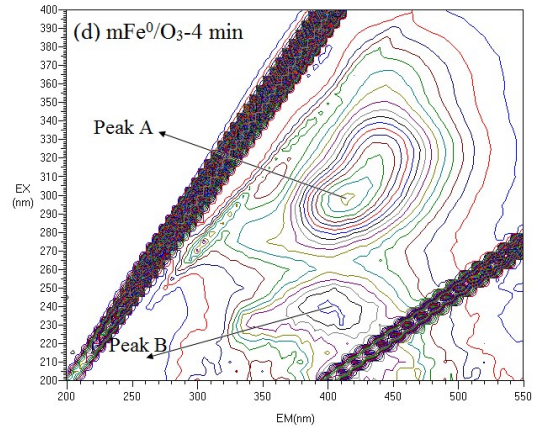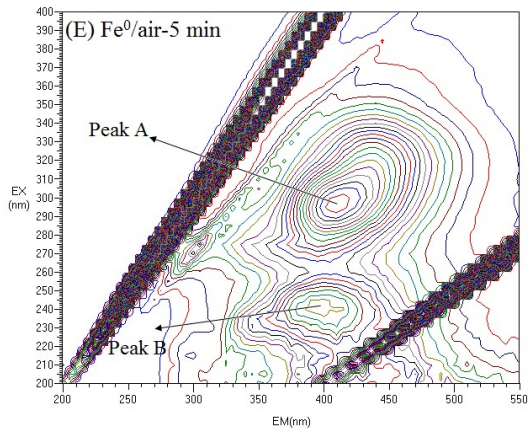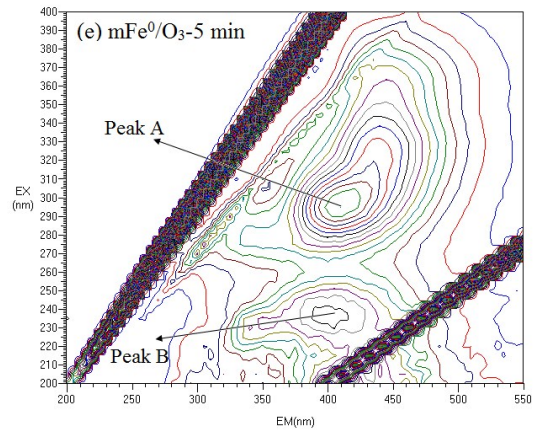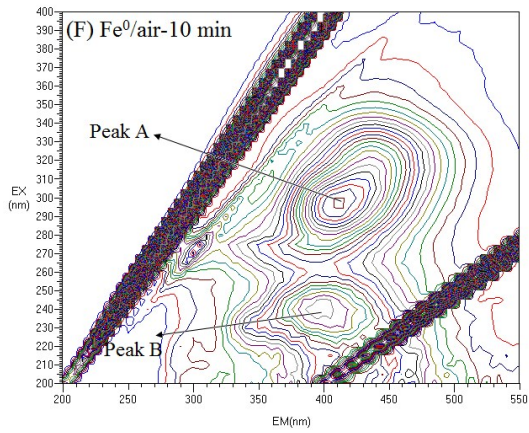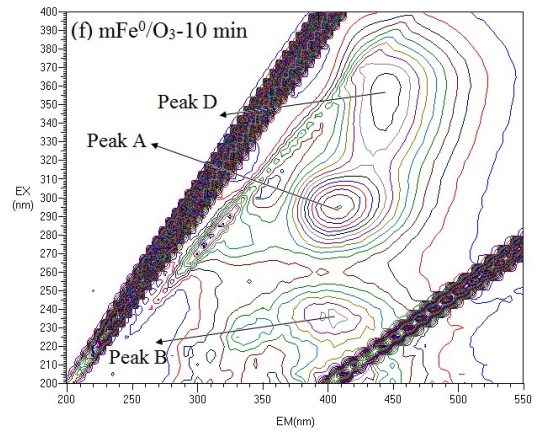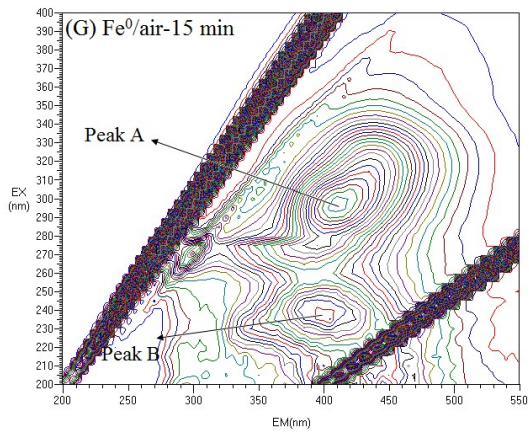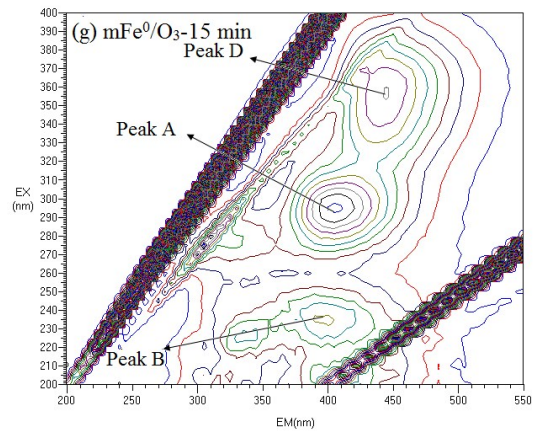

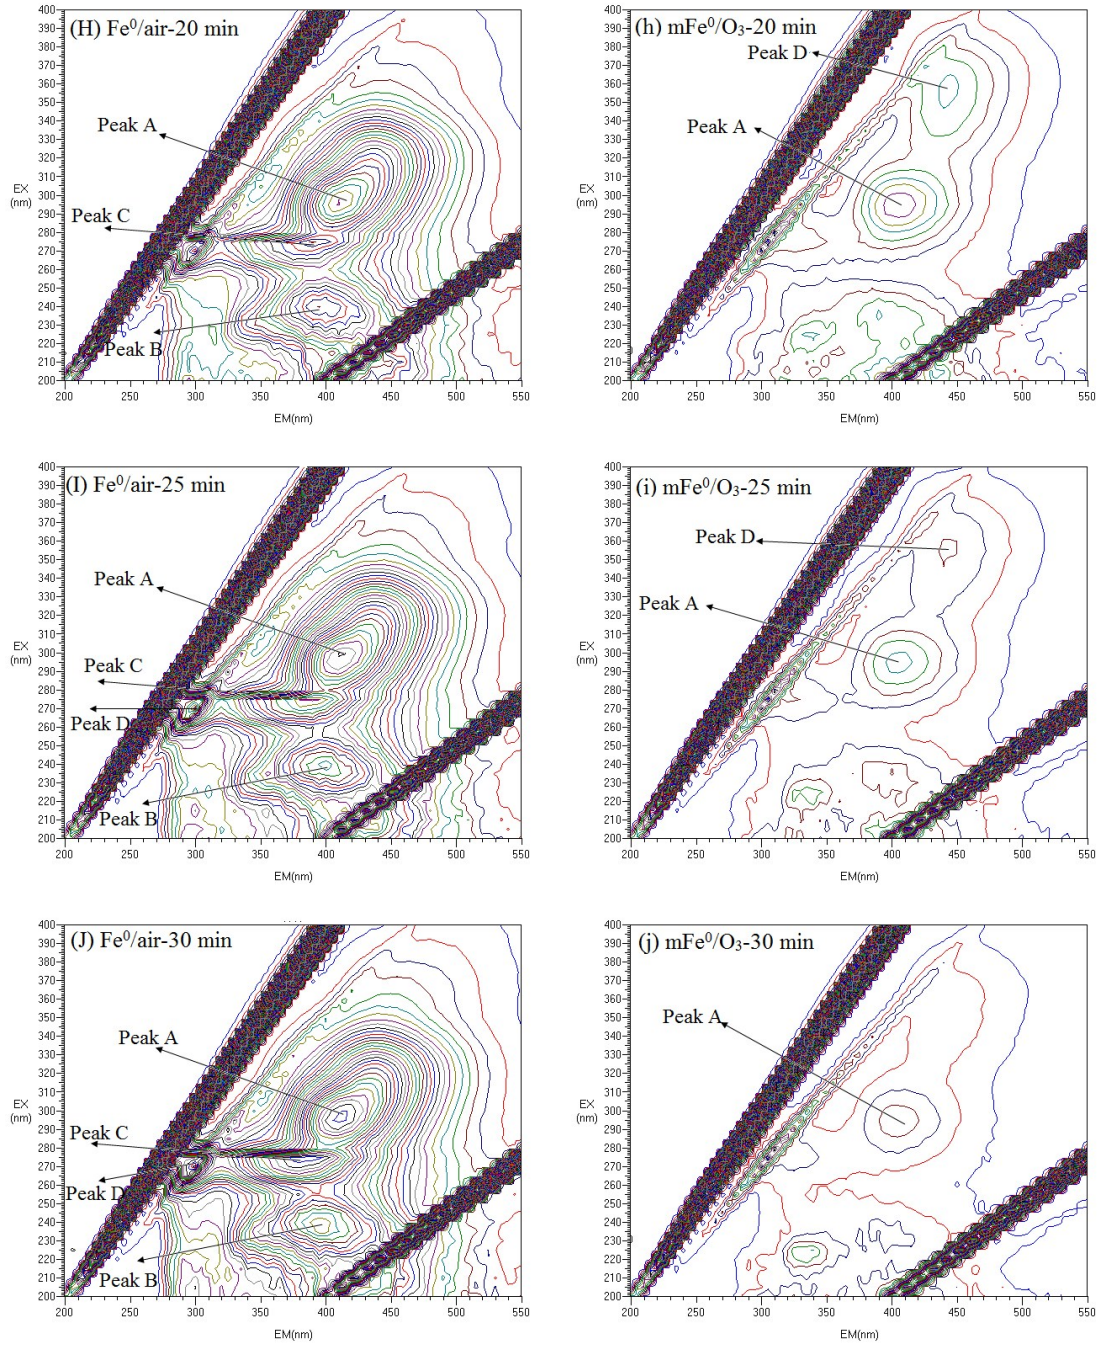

**Fig. S2. Variation of EEM fluorescence spectra by different treatment process, (A-J)  $\text{mFe}^0/\text{air}$ , (a-j)  $\text{mFe}^0/\text{O}_3$  (Influent and effluent were diluted 5 times, reaction time = 30 min).**

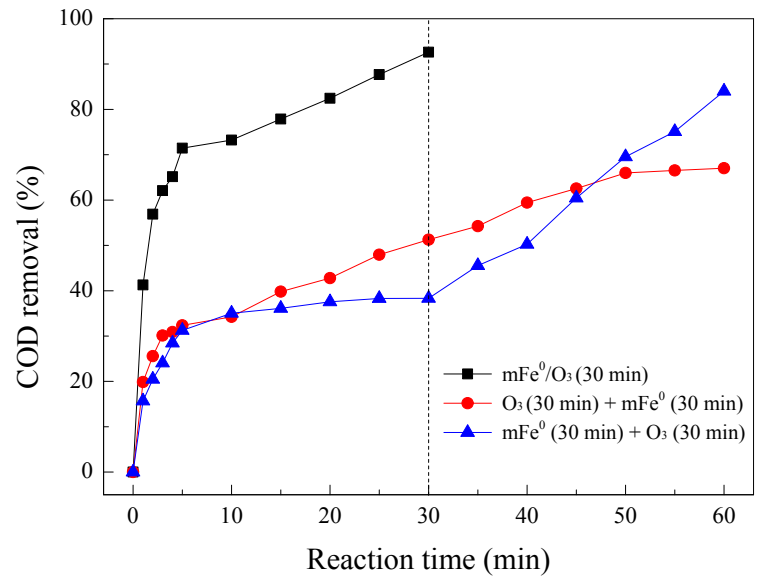

Fig. S3. COD removal efficiencies of different treatment processes.
